# Supplementary material for: A fabric-based hydrovoltaic electricity generator with multi-component carbon black for sustainable energy output
Source: Royal Society of Chemistry journal article supplement (doi:10.1039/d4ra02346c), 2024-01-01
Supplement: d4ra02346c1.pdf [file d4ra02346c1.pdf]

## Supplementary information

### **A fabric-based hydrovoltaic electricity generator with multi-component carbon black for sustainable energy output**

Yahua Liu, <sup>\*a</sup> Bingzhong Xiao <sup>a</sup>, Quanmao Wei <sup>a</sup>, Zichao Yuan <sup>a</sup>, Wenzhuo Song <sup>a</sup>, Ling Zhou <sup>a</sup>, Wenna Ge<sup>\*a</sup>

---

<sup>a</sup> Key Laboratory for Precision & Non-traditional Machining Technology of Ministry of Education, Dalian University of Technology, Dalian 116024, China.  
E-mail: yahualiu@dlut.edu.cn.

*Supplementary Videos*

*Supplementary video 1. Four FWEGs in series to drive an LED for 3 hours.*

*Supplementary video 2. Demonstration of four generators in series to power the calculator.*

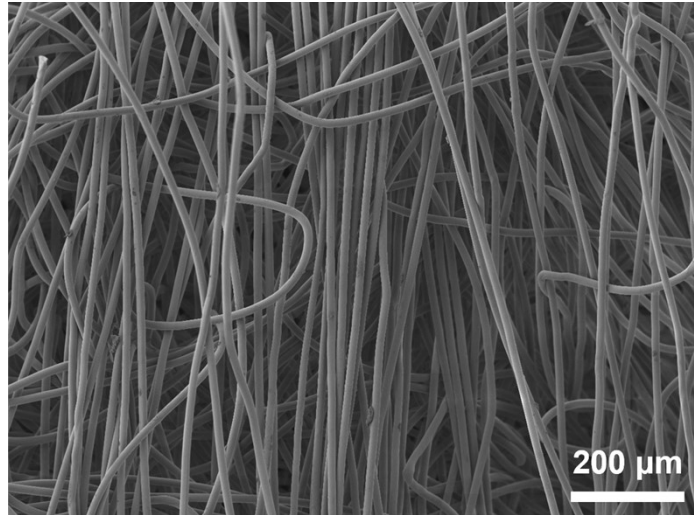

*Fig. S1: SEM images of the original commercially available non-woven fabric.*

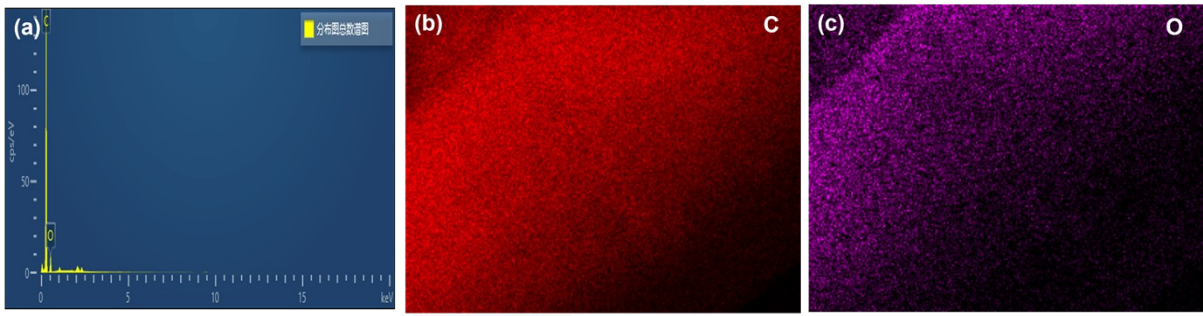

**Fig S2: EDS image of *FWEG*. (a) Total spectrum of distribution map. (b) Carbon element distribution. (c) Oxygen distribution.**

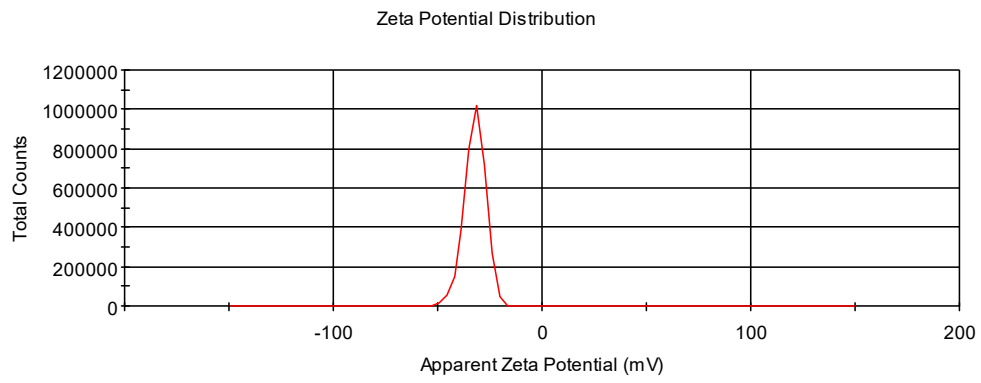

***Fig S3: Zeta potential of N3C7 Carbon black.***

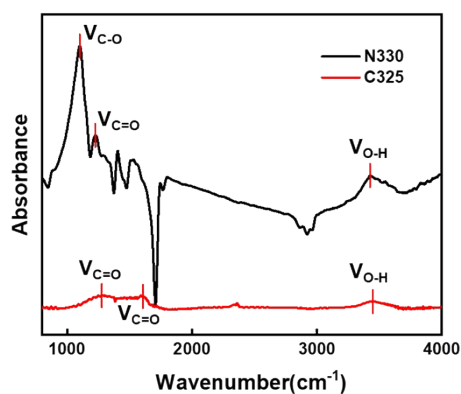

**Fig S4: Fourier transform infrared spectrum (FTIR) of carbon black. N330 carbon black produces characteristic peaks of infrared spectrum at 1098 cm<sup>-1</sup>, 1220 cm<sup>-1</sup> and 3421 cm<sup>-1</sup>, and C325 carbon black produces characteristic peaks of infrared spectrum at 1278 cm<sup>-1</sup>, 1597 cm<sup>-1</sup> and 3438 cm<sup>-1</sup>, which proved that Carbon black was rich in oxygen-containing functional groups (-OH, -COOH).**

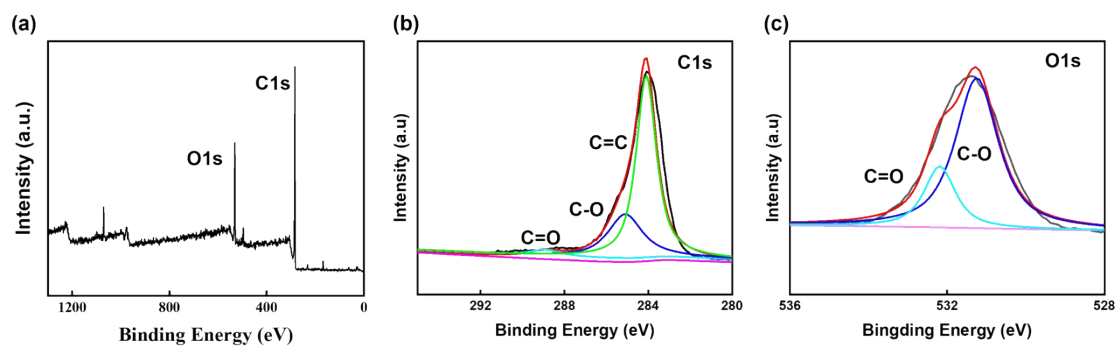

**Fig S5: XPS spectra of N3C7 Carbon black.**

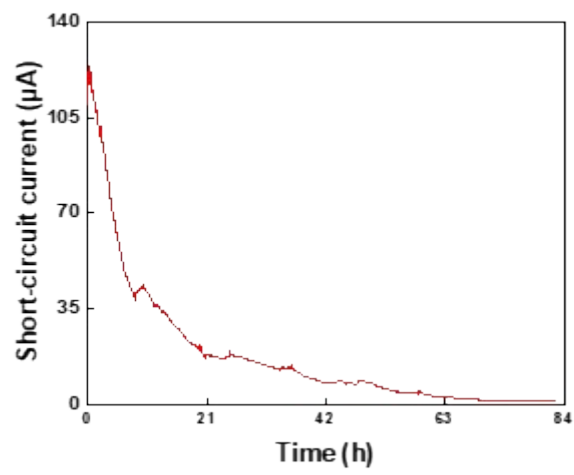

*Fig S6. Short-circuit current testing for long-term electric generation.*



**Table 1. Comparison of the performances and cost of relevant researches**

| Materials               | Current density ( $\mu\text{A}/\text{cm}^2$ ) | Cost (RMB/g) | Ref.      |
|-------------------------|-----------------------------------------------|--------------|-----------|
| $\text{Al}_2\text{O}_3$ | 0.01111                                       | 1.764        | 1         |
| $\text{MoS}_2$          | 0.01389                                       | 12.43219     | 2         |
| $\text{TiO}_2$          | 0.01511                                       | 1615.735     | 3         |
| $\text{AlCl}_3$         | 0.049                                         | 5.7204       | 4         |
| Wood                    | 0.02067                                       | 0.04         | 5         |
| PAN                     | 0.92125                                       | 19.143       | 6         |
| MWCNT                   | 1.51111                                       | 333.022      | 7         |
| Graphite                | 0.02967                                       | 0.49173      | 8         |
| $\text{SiO}_2$          | 0.0381                                        | 0.48         | 9         |
| PPy                     | 2.66667                                       | 199.9        | 10        |
| Carbon black            | 8.54444                                       | 0.0208       | This work |

## References

1. C. Shao, B. Ji, T. Xu, J. Gao, X. Gao, Y. Xiao, Y. Zhao, N. Chen, L. Jiang and L. Qu, *ACS Appl Mater Interfaces*, 2019, **11**, 30927-30935.
2. S. G. Yoon, H. D. Jin, W. H. Lee, J. Han, Y. H. Cho and Y. S. Kim, *Nano Energy.*, 2021, **80**, 105522.
3. B. X. Ji, N. Chen, C. X. Shao, Q. W. Liu, J. Gao, T. Xu, H. H. Cheng and L. T. Qu, *J Mater Chem A.*, 2019, **7**, 6766-6772.
4. Q. Ma, Q. He, P. Yin, H. Cheng, X. Cui, Q. Yun and H. Zhang, *Adv Mater*, 2020, **32**, e2003720.
5. J. Zou, W. Fang, X. He, H. Chen, X. Du, T. T. Jiang, J. P. Qin and L. Zhao, *Journal of Materials Science*, 2021, **56**, 16387-16398.
6. T. Tabrizizadeh, J. Wang, R. Kumar, S. Chaurasia, K. Stamplecoskie and G. Liu, *ACS Appl Mater Interfaces*, 2021, **13**, 50900-50910.
7. R. Kumar, T. Tabrizizadeh, S. Chaurasia, G. J. Liu and K. Stamplecoskie, *Sustainable Energy & Fuels*, 2022, **6**, 1141-1147.
8. L. Wang, L. Liu and N. Solin, *Nanoscale Adv*, 2023, **5**, 820-829.
9. T. Y. Liu, Y. R. Zheng, C. X. Hao, W. Q. Hong, F. X. Wang, H. Jang, Y. J. Hu and C. Z. Li, *Applied Materials Today*, 2023, **32**, 101801.
10. B. K. Tian, X. F. Jiang, W. C. Chu, C. X. Zheng, W. L. Guo and Z. H. Zhang, *Int J Smart Nano Mat.*, 2023, **14**, 230-242.
